# Supplementary material for: Selective defoliation affects plant growth, fruit transcriptional ripening program and flavonoid metabolism in grapevine
Source: PubMed Central journal article supplement (PMC3599245; doi:10.1186/1471-2229-13-30), 2013-02-22

**Additional file 1.** Effects of pre-bloom (PB) and veraison (V) defoliation compared to an untreated control (C) on Sangiovese berry weight (A), soluble solids (B) and titratable acidity (C). Vertical bars indicate the standard deviation of the mean (n = 3 biological replicates).

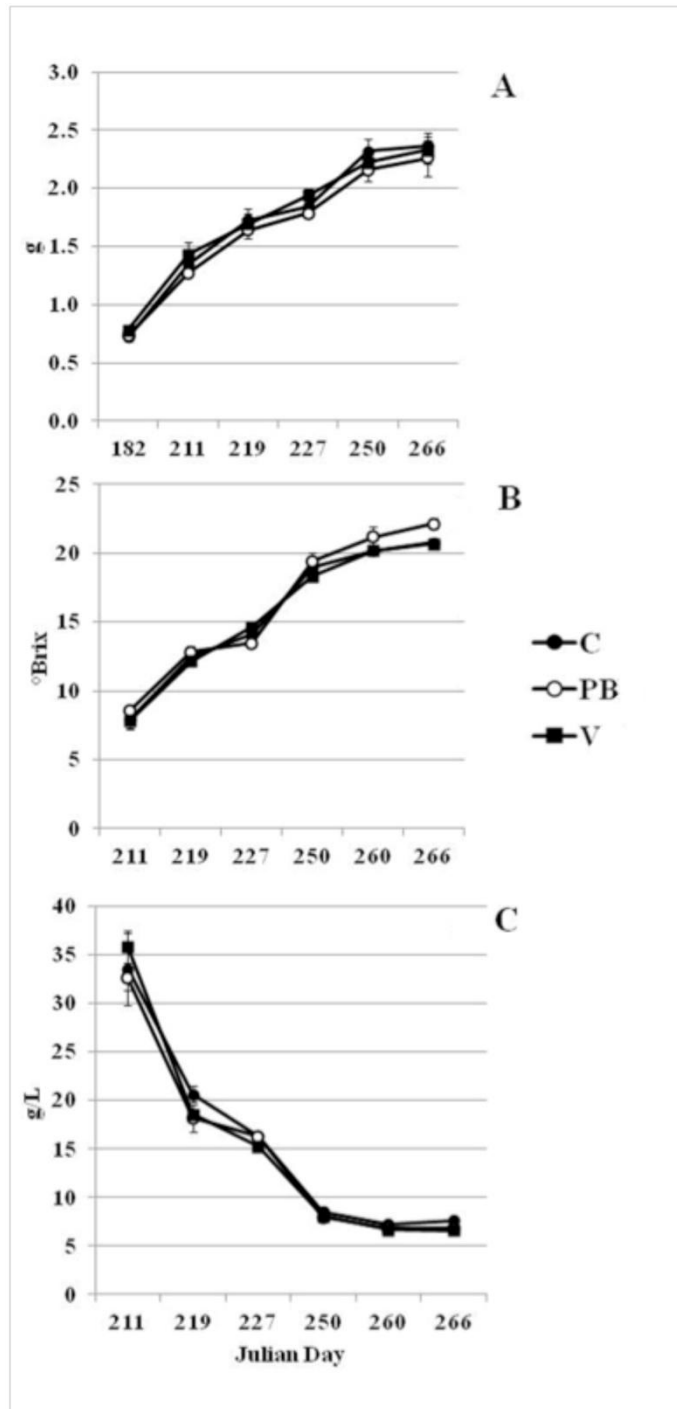

Supplement: 1471-2229-13-30-S1.pdf [file 1471-2229-13-30-S1.pdf]
