# Supplementary material for: Selective defoliation affects plant growth, fruit transcriptional ripening program and flavonoid metabolism in grapevine
Source: PubMed Central journal article supplement (PMC3599245; doi:10.1186/1471-2229-13-30), 2013-02-22
Supplement: 1471-2229-13-30-S6.pdf [file 1471-2229-13-30-S6.pdf]

Additional file 6

| Cluster number | Expression profile                                                                                                                                                                                                                                                    |
|----------------|-----------------------------------------------------------------------------------------------------------------------------------------------------------------------------------------------------------------------------------------------------------------------|
| 1              | 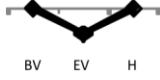 <p>A line graph with three data points labeled BV, EV, and H. The line starts at a high level at BV, dips significantly at EV, and rises to a level similar to BV at H.</p>         |
| 2              |  <p>A line graph with three data points labeled BV, EV, and H. The line starts at a high level at BV and shows a steady, linear decline through EV to a low level at H.</p>          |
| 3              |  <p>A line graph with three data points labeled BV, EV, and H. The line starts at a high level at BV, dips at EV, and then rises to a level higher than BV at H.</p>                 |
| 4              |  <p>A line graph with three data points labeled BV, EV, and H. The line starts at a high level at BV, dips at EV, and then rises to a level similar to BV at H.</p>                  |
| 5              |  <p>A line graph with three data points labeled BV, EV, and H. The line starts at a low level at BV, rises to a peak at EV, and then falls to a level similar to BV at H.</p>       |
| 6              |  <p>A line graph with three data points labeled BV, EV, and H. The line starts at a low level at BV and shows a steady, linear increase through EV to a high level at H.</p>       |
| 7              |  <p>A line graph with three data points labeled BV, EV, and H. The line starts at a low level at BV, remains low at EV, and then rises to a high level at H.</p>                   |
| 8              |  <p>A line graph with three data points labeled BV, EV, and H. The line starts at a low level at BV, rises to a high level at EV, and then dips to a level similar to BV at H.</p> |
