# Supplementary material for: Selective defoliation affects plant growth, fruit transcriptional ripening program and flavonoid metabolism in grapevine
Source: PubMed Central journal article supplement (PMC3599245; doi:10.1186/1471-2229-13-30), 2013-02-22
Supplement: 1471-2229-13-30-S10.pdf [file 1471-2229-13-30-S10.pdf]

**Additional file 10.** List of the primers used for real time RT-PCR.

| <i>Gene-ID</i>                          | <i>Forward primer</i>       | <i>Reverse primer</i>             |
|-----------------------------------------|-----------------------------|-----------------------------------|
| VIT_02s0033g00410/<br>VIT_02s0033g00390 | 5'-GAGGGTGATTTTCCATTTGAT-3' | 5'-CAAGAACAACCTTTTGAACCTAAACAT-3' |
| VIT_17s0000g07210                       | 5'-TCGGGAAGTAAATGAGGTTGT-3' | 5'-TCACAAAACACTACTACTCGC-3'       |
| VIT_18s0001g12800                       | 5'-ACCTGTAGATGGCAAGACCT-3'  | 5'-AAATCAAACCTACCAGAAAACCTT-3'    |
| VIT_15s0046g00170                       | 5'-AAGGTTATTGGGGTTGACGA-3'  | 5'-AGTTTGTCCAGAGAGTTGTCA-3'       |
| VIT_06s0004g03220                       | 5'-GAACTGGGTGCTTGATAGGC-3'  | 5'-AACCAAAATATCCGGAGTAAAAGA-3'    |
